# Supplementary material for: Application of polygenic scores to a deeply phenotyped sample enriched for substance use disorders reveals extensive pleiotropy with psychiatric and somatic traits
Source: PubMed Central journal article supplement (PMC11480112; doi:10.1038/s41386-024-01922-2), 2024-07-23
Supplement: 41386_2024_1922_MOESM1_ESM.pdf [file 41386_2024_1922_MOESM1_ESM.pdf]

Supplementary Figure 1: PGS<sub>MDD</sub> covarying for MDD

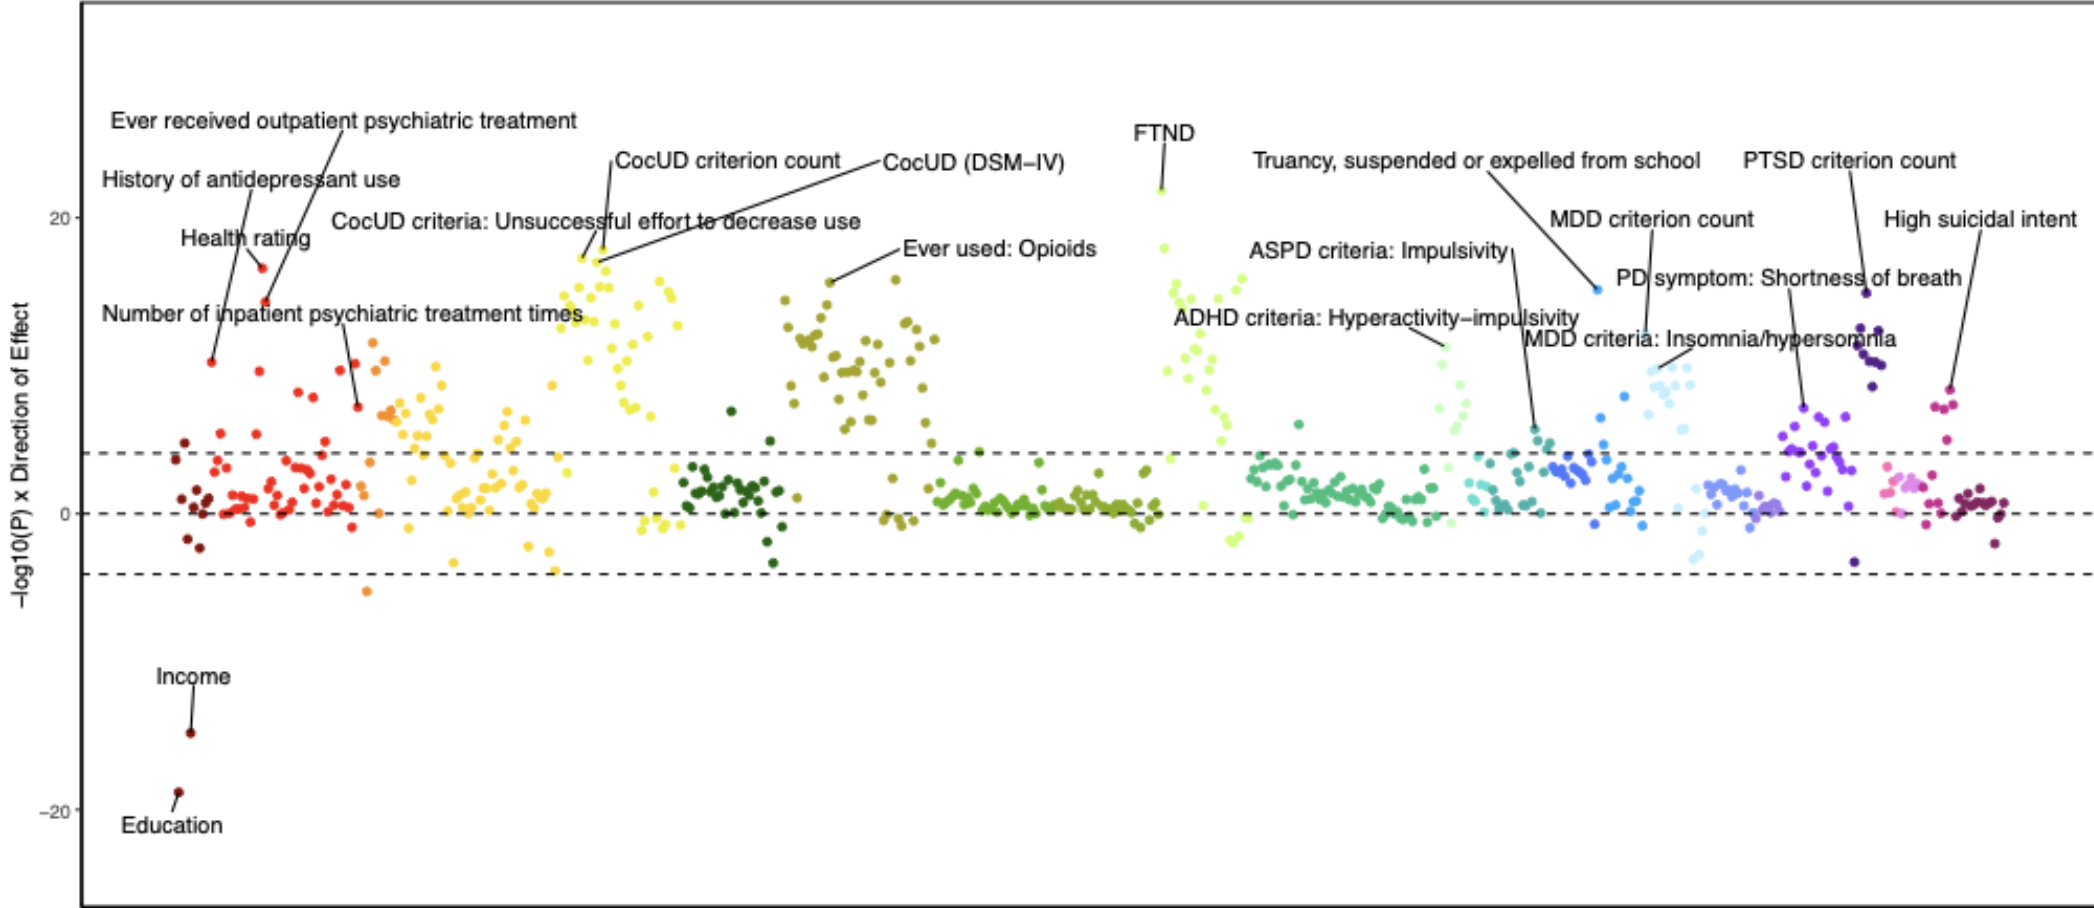

- Group
- Demographics
  - Medical
  - Environment
  - Alcohol
  - Cocaine
  - Marijuana
  - Opiate
  - Sedatives
  - Stimulants
  - Tobacco
  - Other drug
  - ADHD
  - Agoraphobia
  - ASPD
  - Anxiety
  - Conduct Disorder
  - Depression
  - Mania
  - ASPD
  - Anxiety
  - PTSD
  - Schizophrenia
  - Social Phobia
  - Suicide
  - Gambling

Supplementary Figure 2: PGS<sub>GAD</sub> covarying for GAD

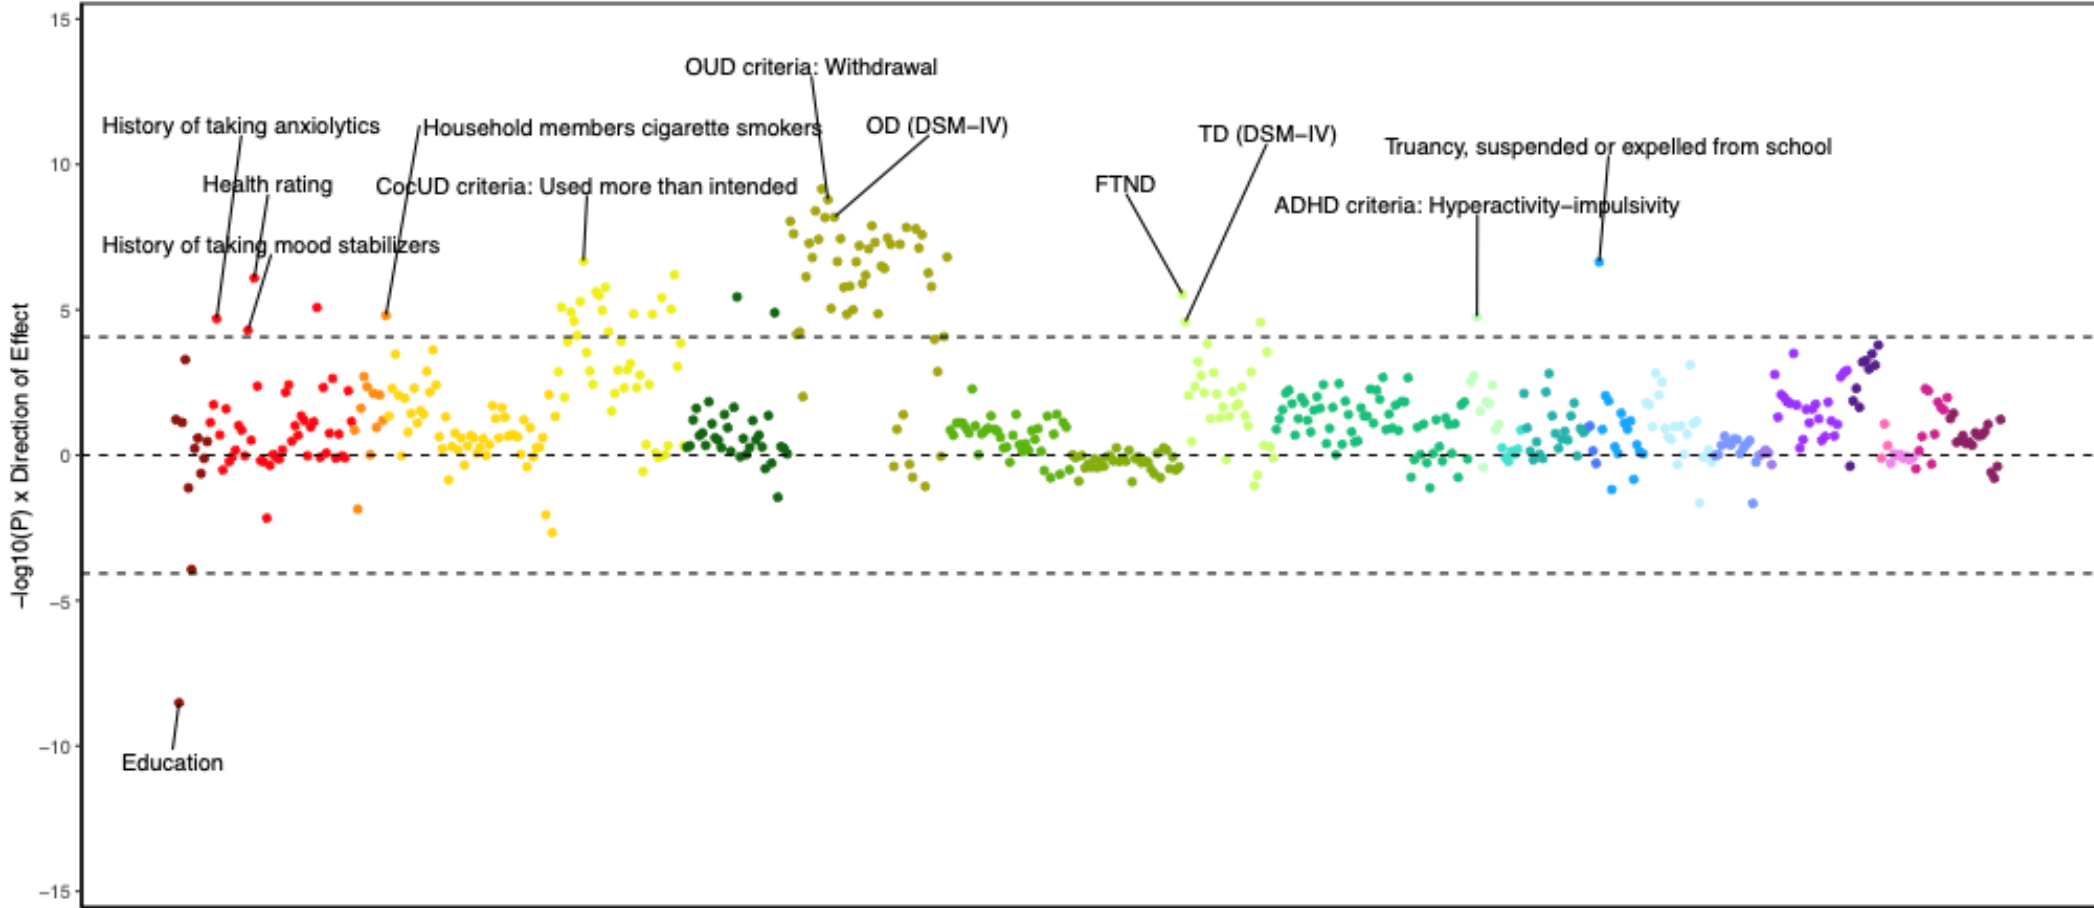

- Group
- Demographics
  - Marijuana
  - Other drug
  - Conduct Disorder
  - PTSD
  - Medical
  - Opiate
  - ADHD
  - Depression
  - Schizophrenia
  - Environment
  - Sedatives
  - Agoraphobia
  - Mania
  - Social Phobia
  - Alcohol
  - Stimulants
  - ASPD
  - OCD
  - Suicide
  - Cocaine
  - Tobacco
  - Anxiety
  - Panic Disorder
  - Gambling

Supplementary Figure 3: PGS<sub>PTSD</sub> covarying for PTSD

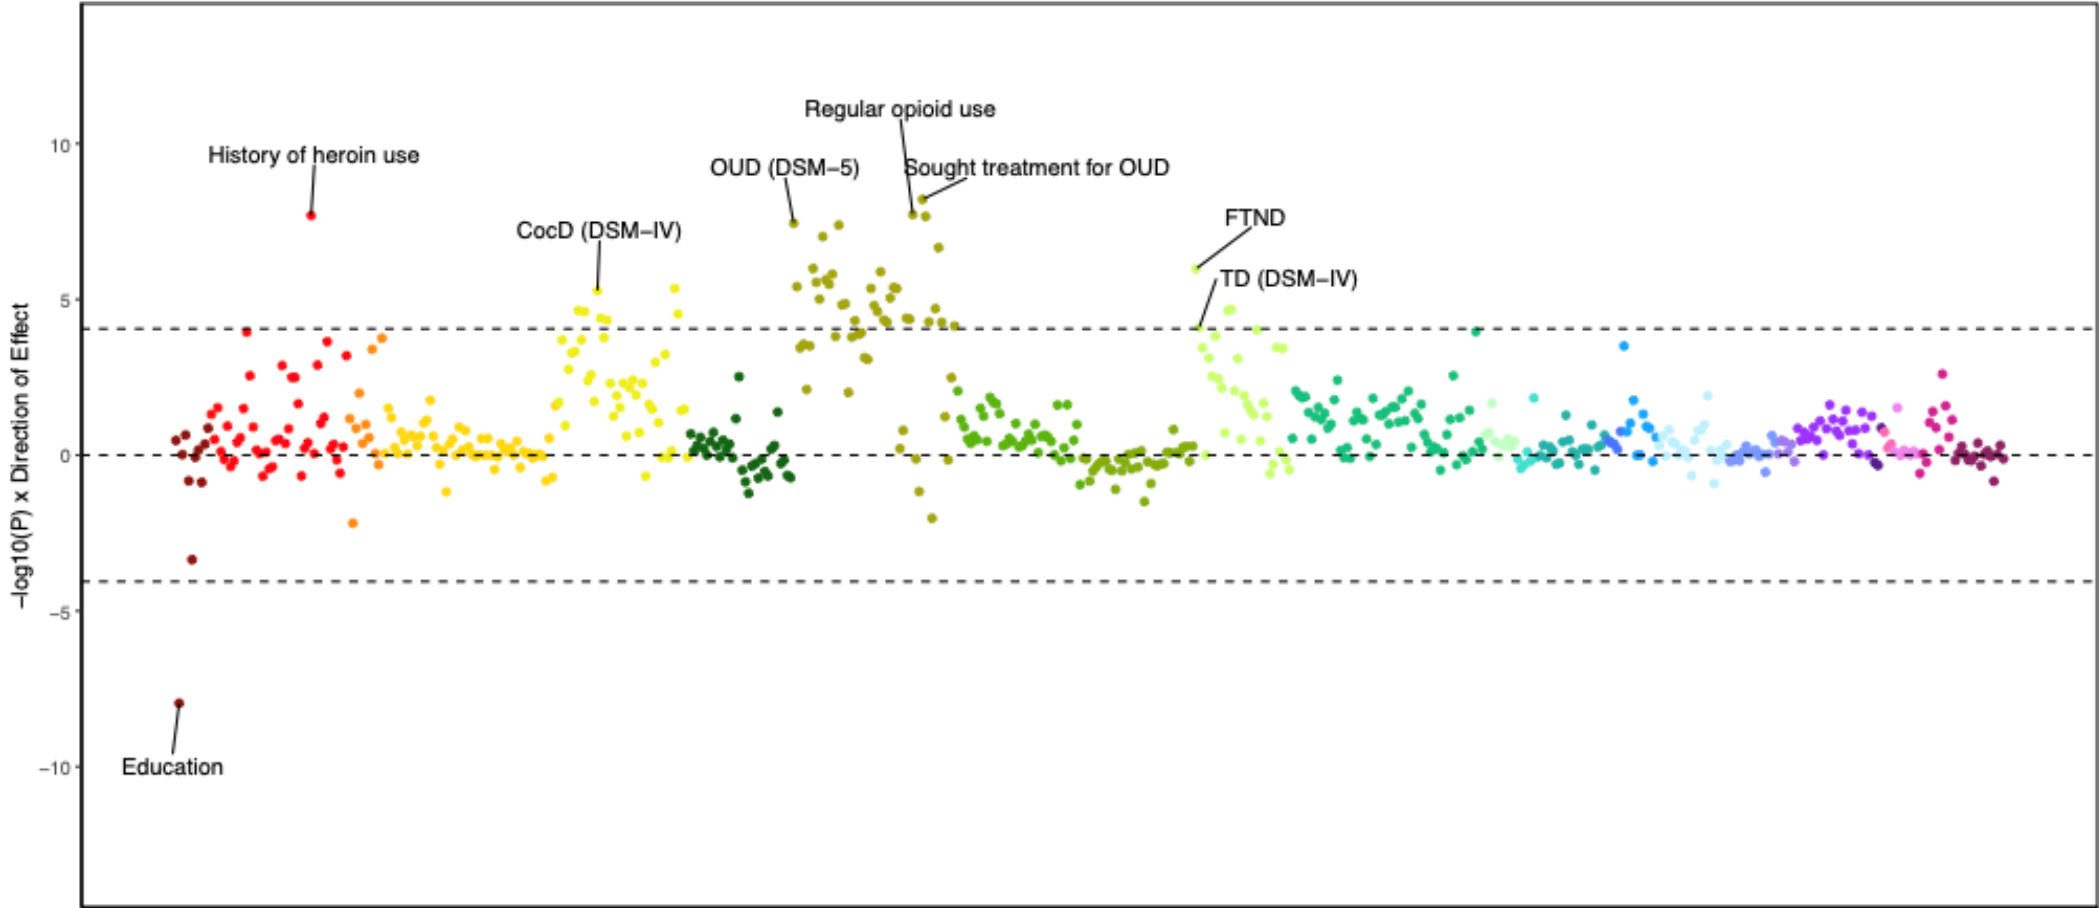

- |                |              |               |                    |                 |
|----------------|--------------|---------------|--------------------|-----------------|
| ● Demographics | ● Marijuana  | ● Other drug  | ● Conduct Disorder | ● PTSD          |
| ● Medical      | ● Opiate     | ● ADHD        | ● Depression       | ● Schizophrenia |
| ● Environment  | ● Sedatives  | ● Agoraphobia | ● Mania            | ● Social Phobia |
| ● Alcohol      | ● Stimulants | ● ASPD        | ● OCD              | ● Suicide       |
| ● Cocaine      | ● Tobacco    | ● Anxiety     | ● Panic Disorder   | ● Gambling      |

Supplementary Figure 4: PGS<sub>BMI</sub> covarying for BMI

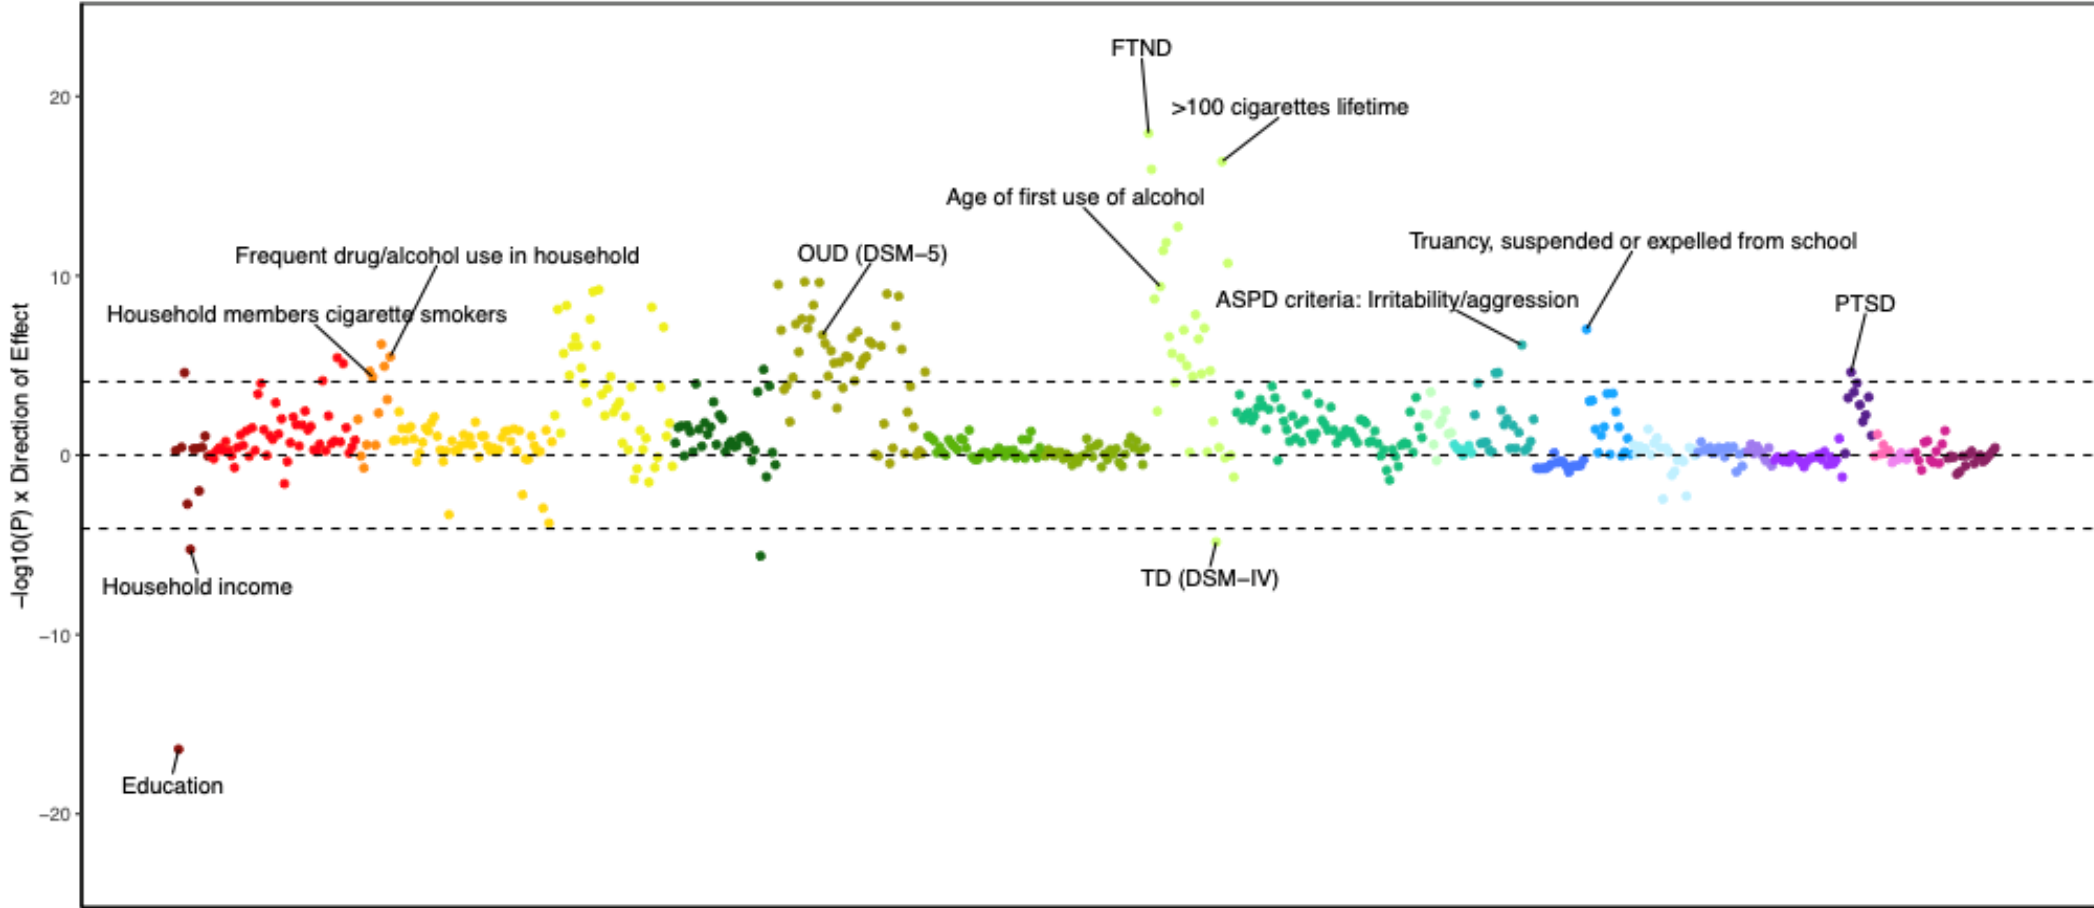

- |                |              |               |                    |                 |
|----------------|--------------|---------------|--------------------|-----------------|
| ● Demographics | ● Marijuana  | ● Other drug  | ● Conduct Disorder | ● PTSD          |
| ● Medical      | ● Opiate     | ● ADHD        | ● Depression       | ● Schizophrenia |
| ● Environment  | ● Sedatives  | ● Agoraphobia | ● Mania            | ● Social Phobia |
| ● Alcohol      | ● Stimulants | ● ASPD        | ● OCD              | ● Suicide       |
| ● Cocaine      | ● Tobacco    | ● Anxiety     | ● Panic Disorder   | ● Gambling      |

Supplementary Figure 5: PGS<sub>CAD</sub> covarying for CAD

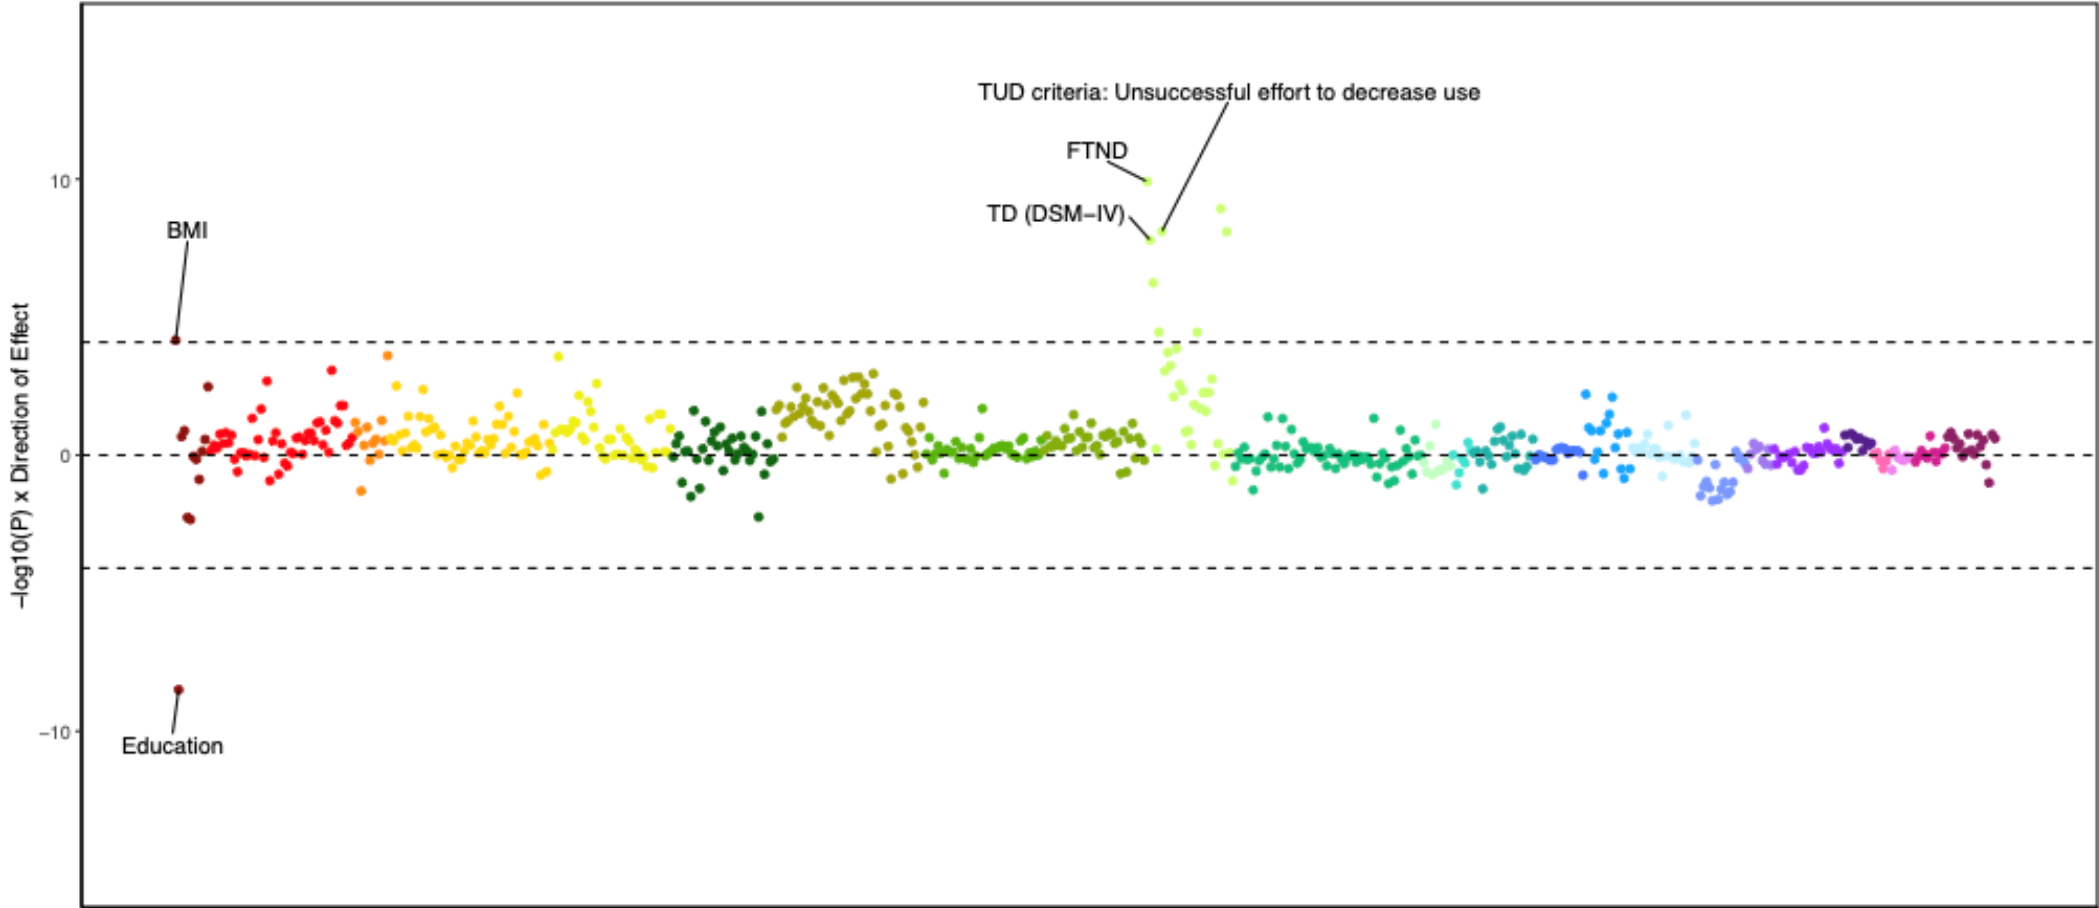

- Group
- Demographics
  - Marijuana
  - Other drug
  - Conduct Disorder
  - PTSD
  - Medical
  - Opiate
  - ADHD
  - Depression
  - Schizophrenia
  - Environment
  - Sedatives
  - Agoraphobia
  - Mania
  - Social Phobia
  - Alcohol
  - Stimulants
  - ASPD
  - OCD
  - Suicide
  - Cocaine
  - Tobacco
  - Anxiety
  - Panic Disorder
  - Gambling

Supplementary Figure 6: PGS<sub>T2D</sub> covarying for T2D

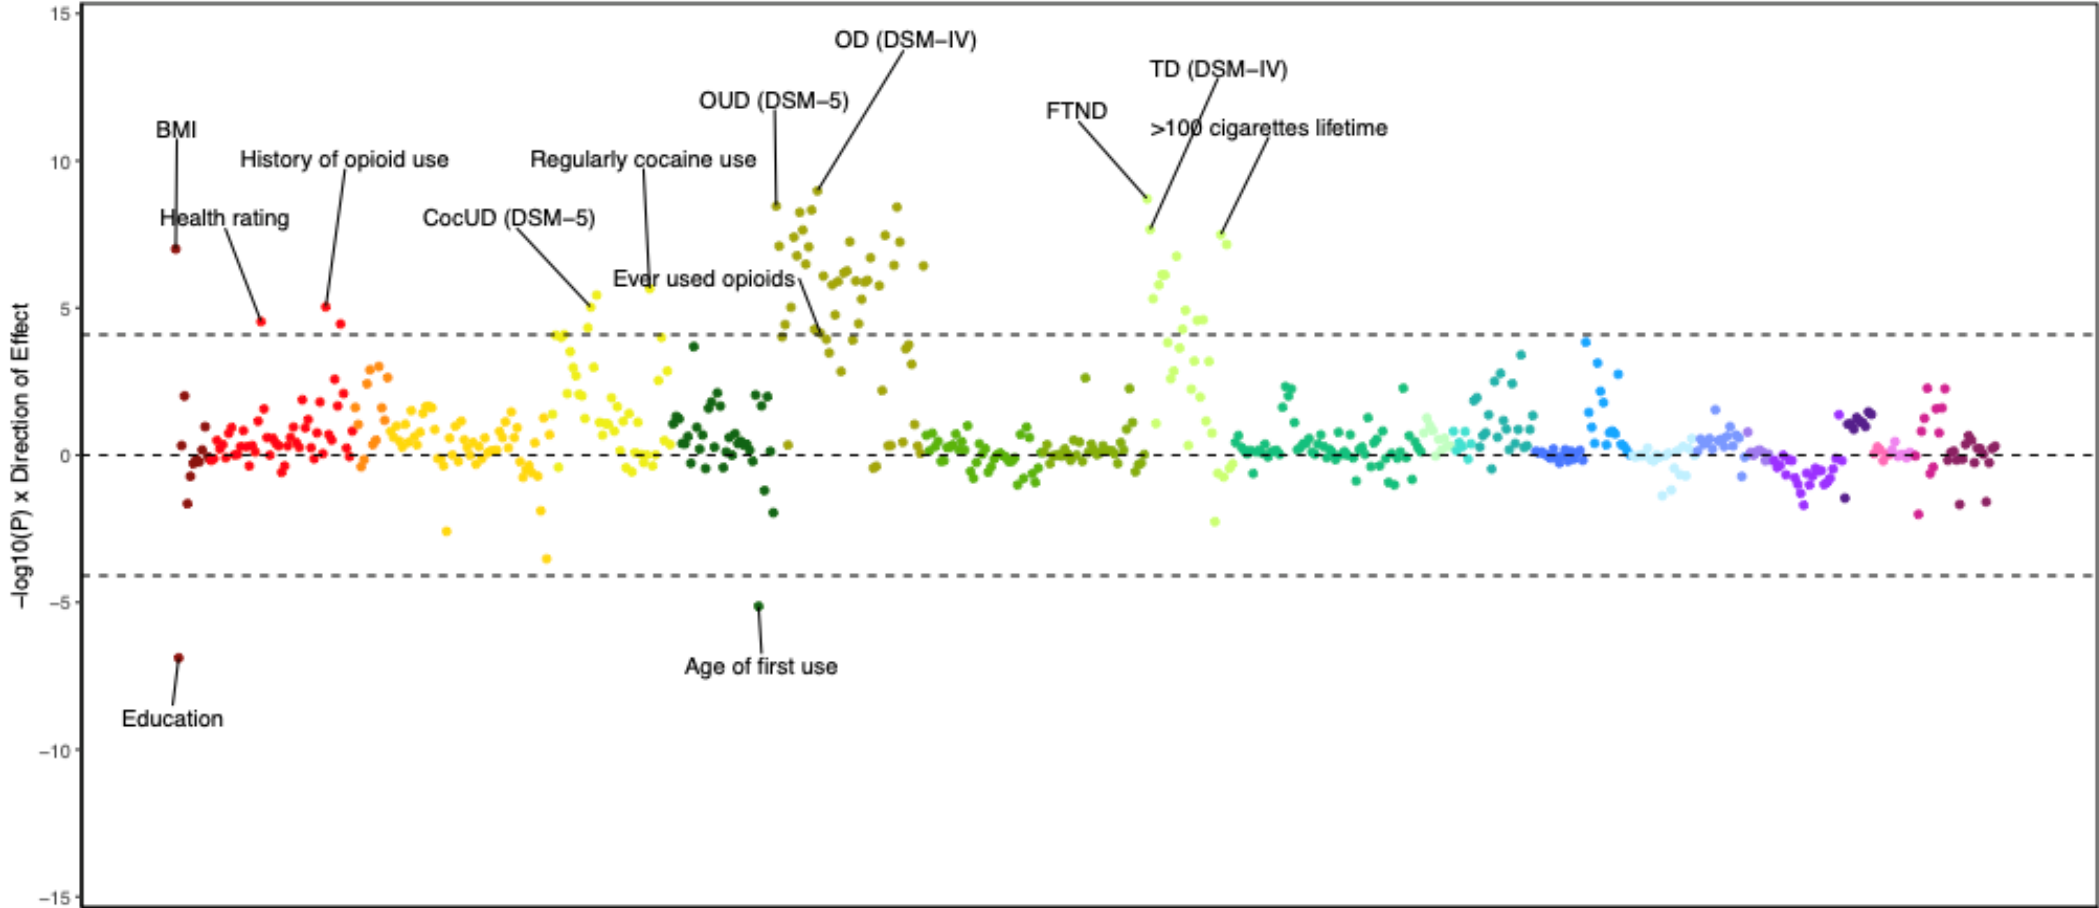

- Group
- Demographics
  - Marijuana
  - Other drug
  - Conduct Disorder
  - PTSD
  - Medical
  - Opiate
  - ADHD
  - Depression
  - Schizophrenia
  - Environment
  - Sedatives
  - Agoraphobia
  - Mania
  - Social Phobia
  - Alcohol
  - Stimulants
  - ASPD
  - OCD
  - Suicide
  - Cocaine
  - Tobacco
  - Anxiety
  - Panic Disorder
  - Gambling
